# Supplementary material for: Comprehensive investigation of the electronic excitation of W(CO)6by photoabsorption and theoretical analysis in the energy region from 3.9 to 10.8 eV
Source: publisher site journal article supplement (doi:10.3762/bjnano.8.220), 2017-10-23
Supplement: Additional file 1 [file 2190-4286-8-220-S1.pdf]

# Supporting Information

for

## Comprehensive investigation of the electronic excitation of $\text{W}(\text{CO})_6$ by photoabsorption and theoretical analysis in the energy region from 3.9 to 10.8 eV

Mónica Mendes<sup>1</sup>, Khrystyna Regeta<sup>1</sup>, Filipe Ferreira da Silva<sup>1</sup>, Nykola C. Jones<sup>2</sup>, Søren Vrønning Hoffmann<sup>2</sup>, Gustavo García<sup>3</sup>, Chantal Daniel<sup>\*,4</sup> and Paulo Limão-Vieira<sup>\*,1</sup>

Address: <sup>1</sup>Laboratório de Colisões Atómicas e Moleculares, CEFITEC, Departamento de Física, Universidade NOVA de Lisboa, 2829-516, Caparica, Portugal; <sup>2</sup>ISA, Department of Physics and Astronomy, Aarhus University, Ny Munkegade 120, DK-8000, Aarhus C, Denmark <sup>3</sup>Instituto de Física Fundamental, Consejo Superior de Investigaciones Científicas (CSIC), Serrano 113-bis, 28006 Madrid, Spain and <sup>4</sup>Laboratoire de Chimie Quantique, Institut de Chimie Strasbourg, UMR7177 CNRS/Université de Strasbourg 1 Rue Blaise Pascal BP296/R8, F-67008 Strasbourg, France

Email: Paulo Limão-Vieira\* - plimaovieira@fct.unl.pt; Chantal Daniel\* - c.daniel@unistra.fr;

\* Corresponding author

## Additional computational data

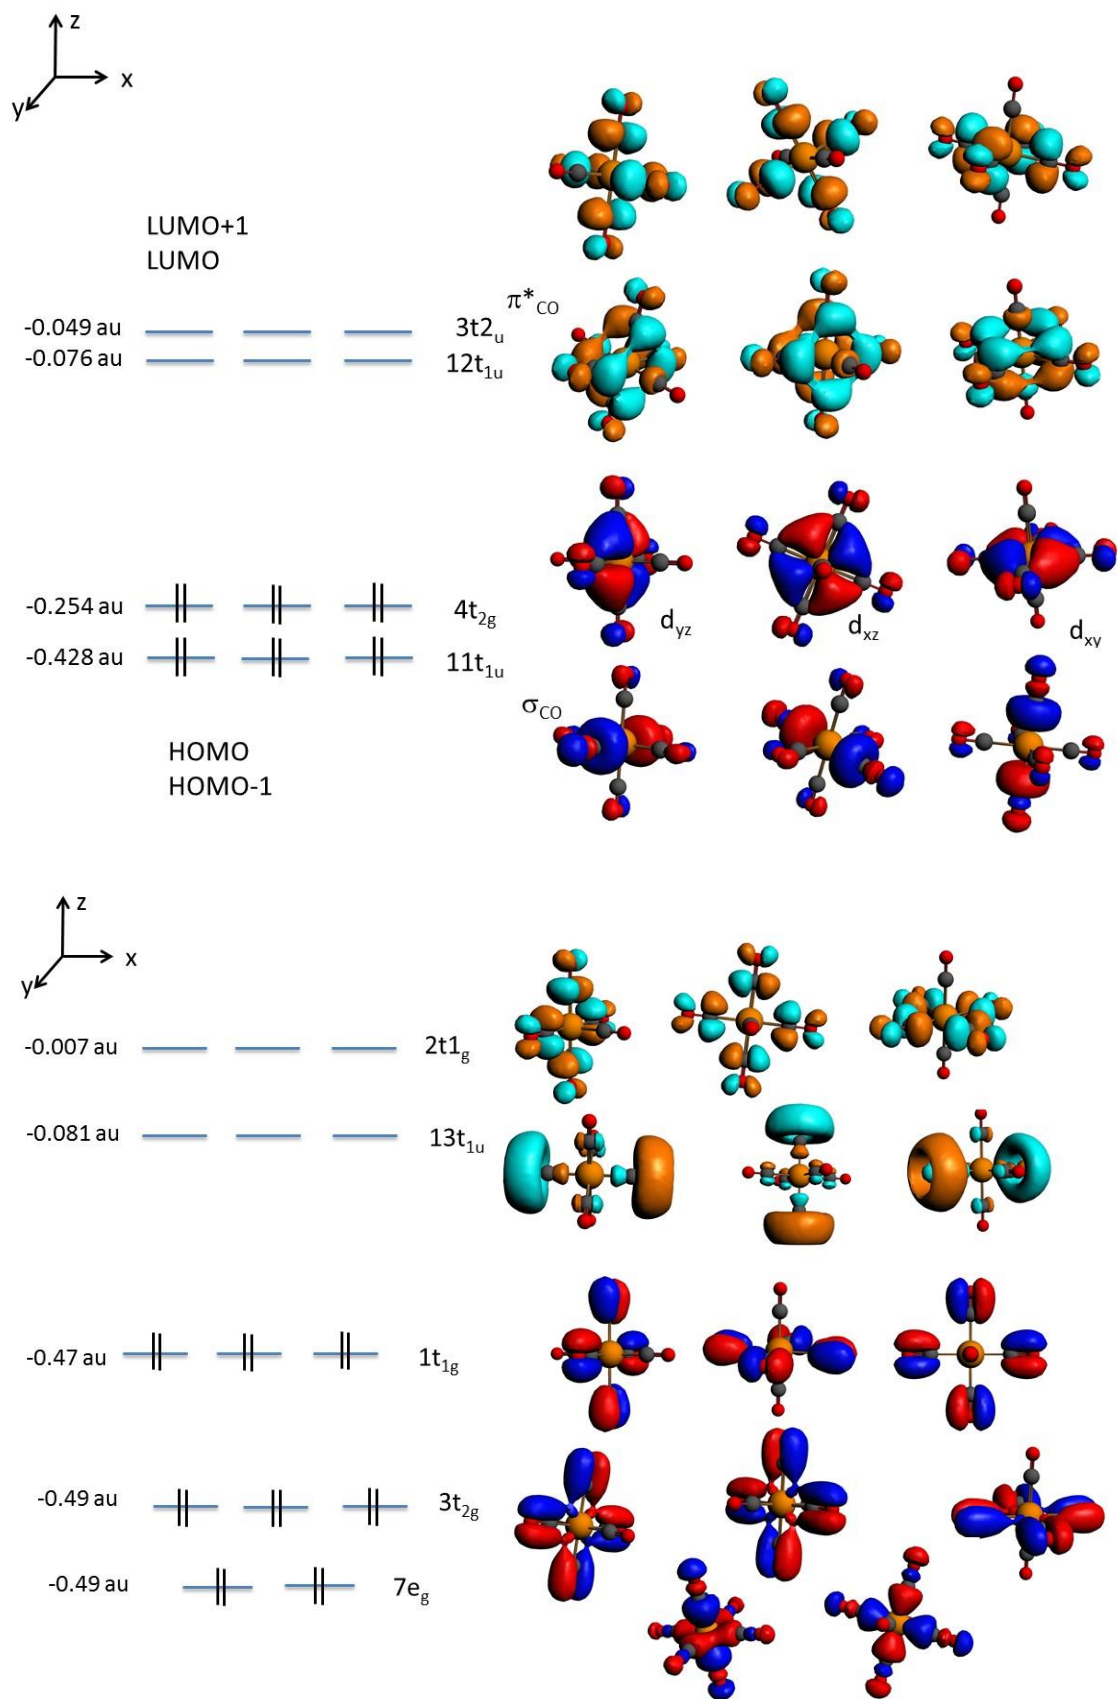

**Figure S1:** Kohn–Sham orbitals of  $W(CO)_6$  ( $O_h$  symmetry) involved in major electronic transitions.

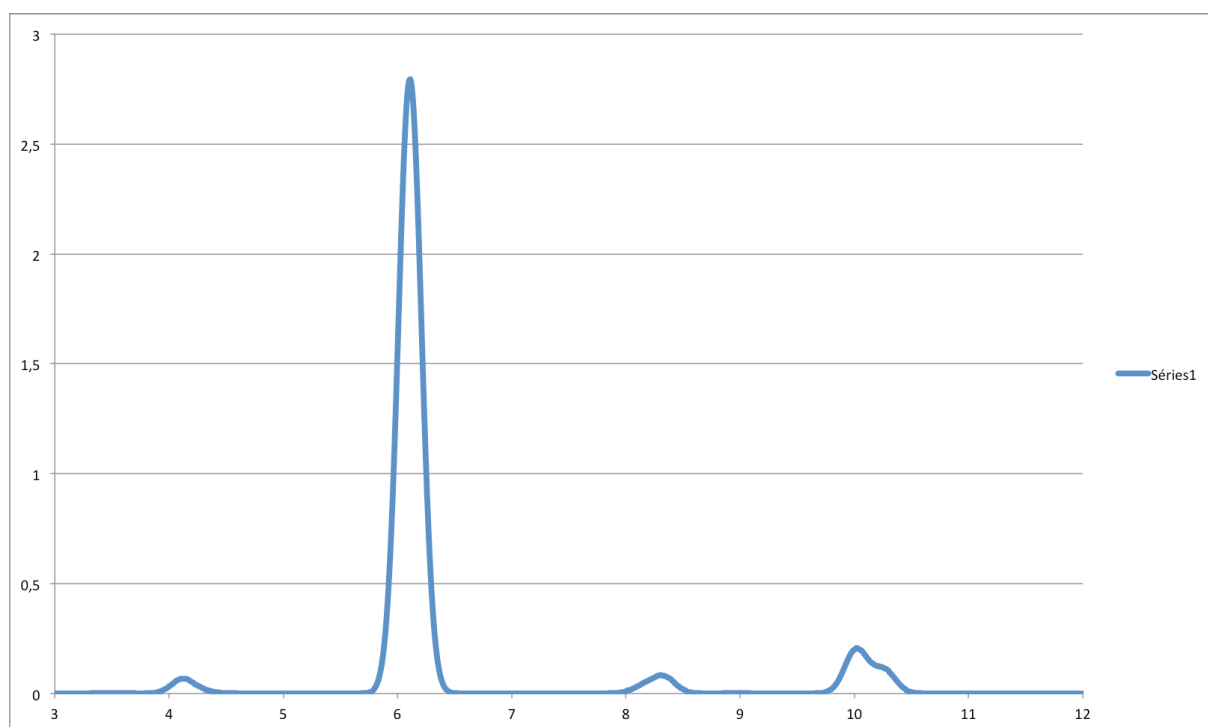

**Figure S2:** TDDFT spectrum of  $W(CO)_6$  without spin-orbit coupling.

**Table S1:** Transition energies (in eV), oscillator strengths ( $>10^{-3}$ ) and character of the lowest singlet states without spin-orbit coupling.

| state                           | transition energy<br>(eV) | oscillator<br>strength | character                       |
|---------------------------------|---------------------------|------------------------|---------------------------------|
| 1 <sup>1</sup> T <sub>1u</sub>  | 4.12                      | 0.024                  | <sup>1</sup> MLCT <sub>co</sub> |
| 2 <sup>1</sup> T <sub>1u</sub>  | 6.10                      | 0.93                   | <sup>1</sup> MLCT <sub>co</sub> |
| 3 <sup>1</sup> T <sub>1u</sub>  | 8.28                      | 0.035                  | <sup>1</sup> MLCT <sub>co</sub> |
| 1 <sup>1</sup> T <sub>1g</sub>  | 7.21                      | 0.0                    | <sup>1</sup> MC                 |
| 1 <sup>1</sup> T <sub>2g</sub>  | 7.43                      | 0.0                    | <sup>1</sup> MC                 |
| 4 <sup>1</sup> T <sub>1u</sub>  | 10.02                     | 0.067                  | <sup>1</sup> IL                 |
| 5 <sup>1</sup> T <sub>1u</sub>  | 10.26                     | 0.035                  | <sup>1</sup> IL                 |
| 7 <sup>1</sup> T <sub>1u</sub>  | 10.52                     | 0.083                  | <sup>1</sup> IL                 |
| 8 <sup>1</sup> T <sub>1u</sub>  | 10.88                     | 0.042                  | <sup>1</sup> IL                 |
| 9 <sup>1</sup> T <sub>1u</sub>  | 10.97                     | 0.042                  | <sup>1</sup> IL                 |
| 10 <sup>1</sup> T <sub>1u</sub> | 11.12                     | 0.011                  | <sup>1</sup> IL                 |
| 11 <sup>1</sup> T <sub>1u</sub> | 11.21                     | 0.017                  | <sup>1</sup> IL                 |
| 12 <sup>1</sup> T <sub>1u</sub> | 11.52                     | 0.001                  | <sup>1</sup> IL                 |

**Table S2:** Transition energies (in eV) and character of the lowest triplet states without spin-orbit coupling.

| state       | transition energy (eV) | character     |
|-------------|------------------------|---------------|
| $1^3A_{2u}$ | 3.46                   | $^3MLCT_{CO}$ |
| $1^3T_{1u}$ | 3.46                   | $^3MLCT_{CO}$ |
| $1^3T_{2u}$ | 3.59                   | $^3MLCT_{CO}$ |
| $1^3E_u$    | 3.60                   | $^3MLCT_{CO}$ |
| $2^3E_u$    | 4.27                   | $^3MLCT_{CO}$ |
| $1^3A_{1u}$ | 4.37                   | $^3IL$        |
| $2^3T_{1u}$ | 4.38                   | $^3MLCT_{CO}$ |
| $2^3T_{2u}$ | 4.42                   | $^3MLCT_{CO}$ |
| $1^3E_g$    | 5.28                   | $^3MLCT_{CO}$ |
| $1^3A_{2g}$ | 5.39                   | $^3MLCT_{CO}$ |
| $1^3T_{2g}$ | 5.54                   | $^3MLCT_{CO}$ |
| $1^3T_{1g}$ | 5.62                   | $^3MLCT_{CO}$ |
| $1^3A_{1g}$ | 5.74                   | $^3MLCT_{CO}$ |
| $2^3E_g$    | 6.17                   | $^3MLCT_{CO}$ |
| $2^3T_{2g}$ | 6.26                   | $^3MLCT_{CO}$ |
| $3^3T_{2g}$ | 6.34                   | $^3MLCT_{CO}$ |
| $2^3T_{1g}$ | 6.53                   | $^3MLCT_{CO}$ |
| $3^3T_{1g}$ | 6.96                   | $^3MC$        |
| $4^3T_{2g}$ | 7.08                   | $^3MC$        |
| $2^3A_{1g}$ | 7.69                   | $^3IL$        |
| $5^3T_{2g}$ | 7.72                   | $^3IL$        |
| $4^3T_{1g}$ | 7.75                   | $^3IL$        |
| $3^3E_g$    | 7.94                   | $^3IL$        |
| $3^3T_{1u}$ | 7.97                   | $^3IL$        |
| $4^3T_{1u}$ | 8.22                   | $^3MLCT_{CO}$ |
| $3^3T_{2u}$ | 8.22                   | $^3MLCT_{CO}$ |
| $2^3A_{2u}$ | 8.26                   | $^3MLCT_{CO}$ |
| $3^3E_u$    | 8.27                   | $^3MLCT_{CO}$ |
| $4^3E_g$    | 8.31                   | $^3IL$        |
| $6^3T_{2g}$ | 8.60                   | $^3IL$        |
| $2^3A_{2g}$ | 8.66                   | $^3IL$        |
| $4^3E_u$    | 8.72                   | $^3IL$        |
| $4^3T_{2u}$ | 8.74                   | $^3MLCT_{CO}$ |
| $3^3A_{1g}$ | 8.75                   | $^3IL$        |
| $3^3A_{2u}$ | 8.84                   | $^3IL$        |
| $5^3E_g$    | 8.93                   | $^3IL$        |
| $5^3T_{2u}$ | 8.94                   | $^3IL$        |
| $5^3T_{1g}$ | 8.95                   | $^3IL$        |
| $5^3T_{1u}$ | 9.00                   | $^3IL$        |
| $7^3T_{2g}$ | 9.25                   | $^3IL$        |
| $2^3A_{1u}$ | 9.26                   | $^3IL$        |
| $6^3E_g$    | 9.41                   | $^3IL$        |
| $5^3E_u$    | 9.45                   | $^3IL$        |

|              |       |               |
|--------------|-------|---------------|
| $3^3A_{2g}$  | 9.46  | $^3\bar{I}L$  |
| $6^3T_{1g}$  | 9.51  | $^3\bar{I}L$  |
| $6^3T_{1u}$  | 10.04 | $^3\bar{I}L$  |
| $6^3T_{2u}$  | 10.06 | $^3\bar{I}L$  |
| $8^3T_{2g}$  | 10.06 | $^3\bar{I}L$  |
| $7^3T_{1g}$  | 10.07 | $^3\bar{I}L$  |
| $8^3T_{1g}$  | 10.14 | $^3MC$        |
| $9^3T_{2g}$  | 10.20 | $^3MC$        |
| $7^3T_{1u}$  | 10.22 | $^3\bar{I}L$  |
| $7^3T_{2u}$  | 10.43 | $^3\bar{I}L$  |
| $4^3A_{1g}$  | 10.45 | $^3MLCT_{CO}$ |
| $6^3E_u$     | 10.48 | $^3\bar{I}L$  |
| $10^3T_{2g}$ | 10.49 | $^3\bar{I}L$  |
| $7^3E_g$     | 10.51 | $^3\bar{I}L$  |
| $8^3T_{1u}$  | 10.51 | $^3\bar{I}L$  |
